# Supplementary material
Source: PubMed Central journal article supplement (PMC3924519)

**Figure S1**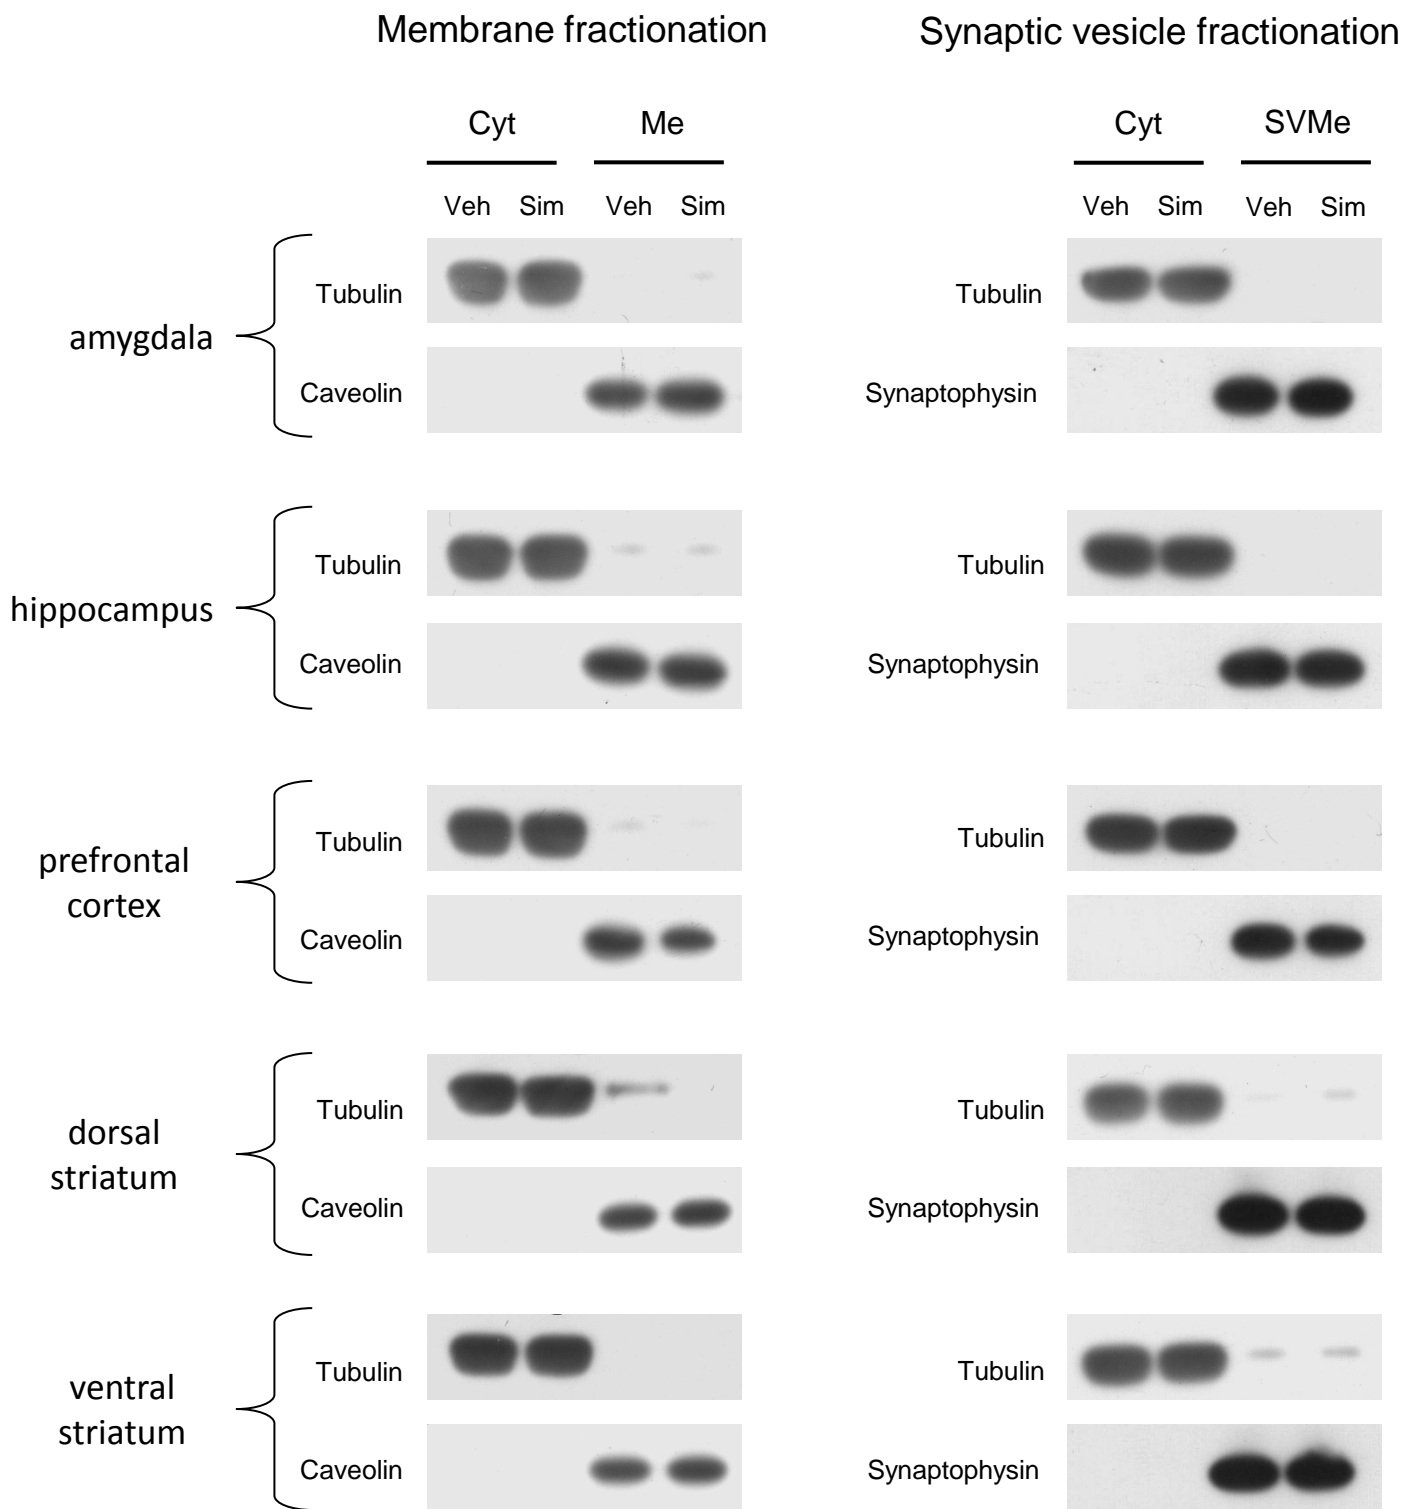

Supplement: npp2013284x2.pdf [file npp2013284x2.pdf]

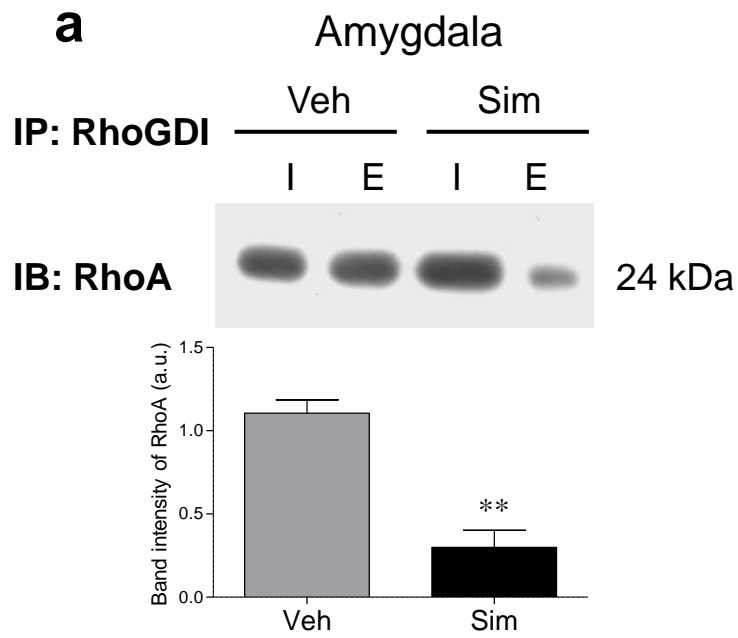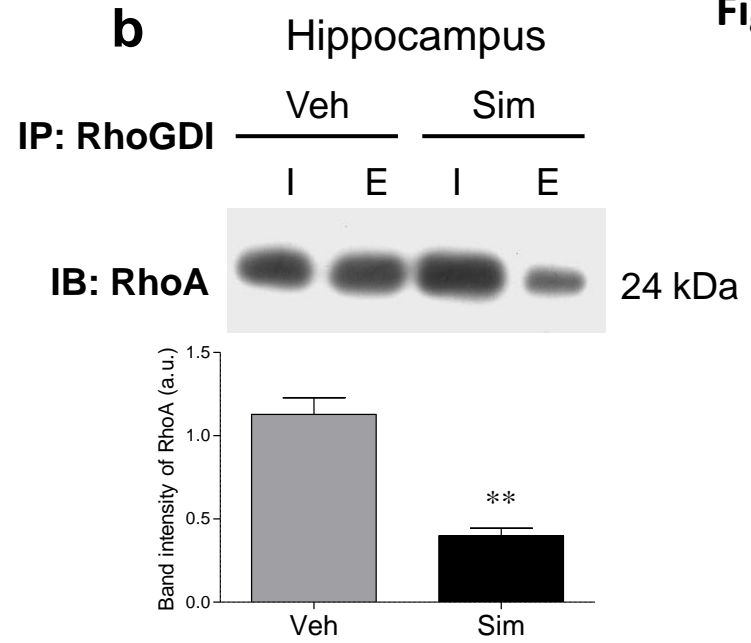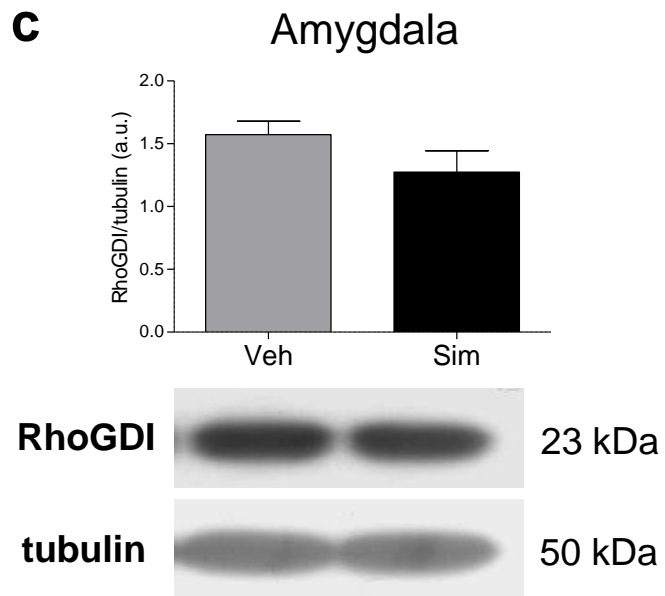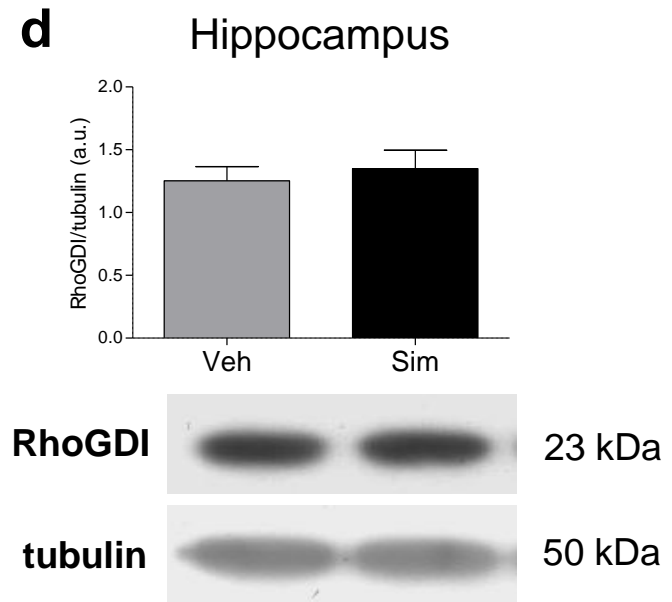

Supplement: npp2013284x5.pdf [file npp2013284x5.pdf]

Figure S5

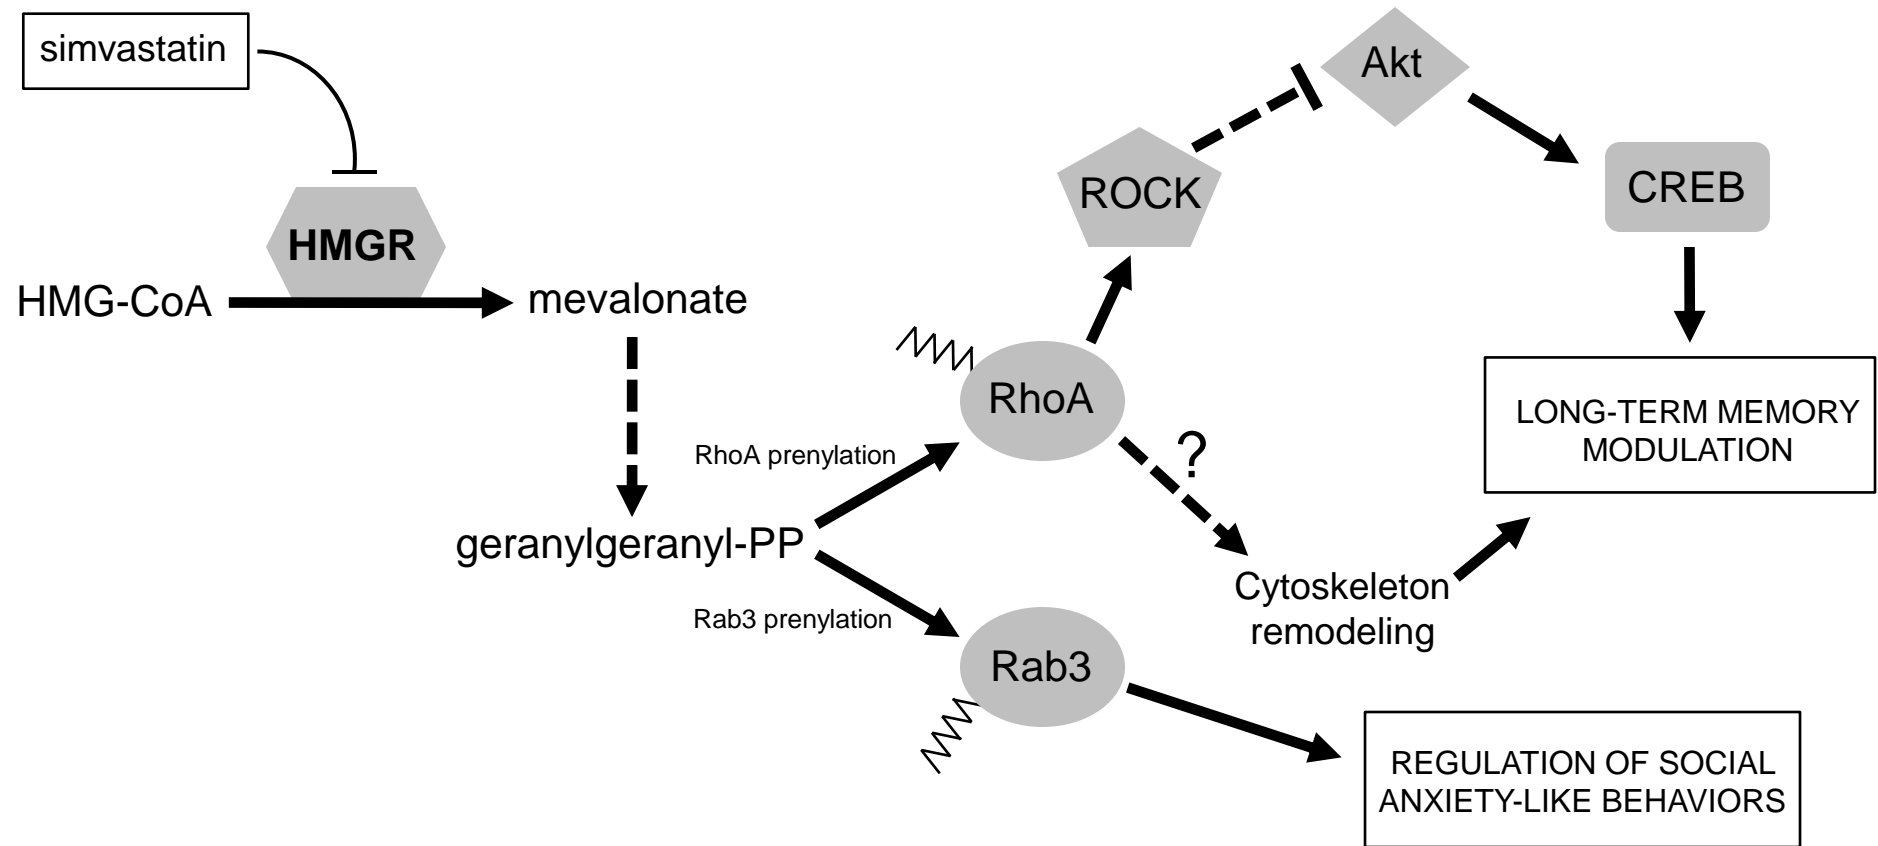

Supplement: npp2013284x6.pdf [file npp2013284x6.pdf]
